# Supplementary material for: A standard procedure for creating a frailty index
Source: Springer Nature journal article supplement (doi:10.1186/1471-2318-8-24), 2008-09-30

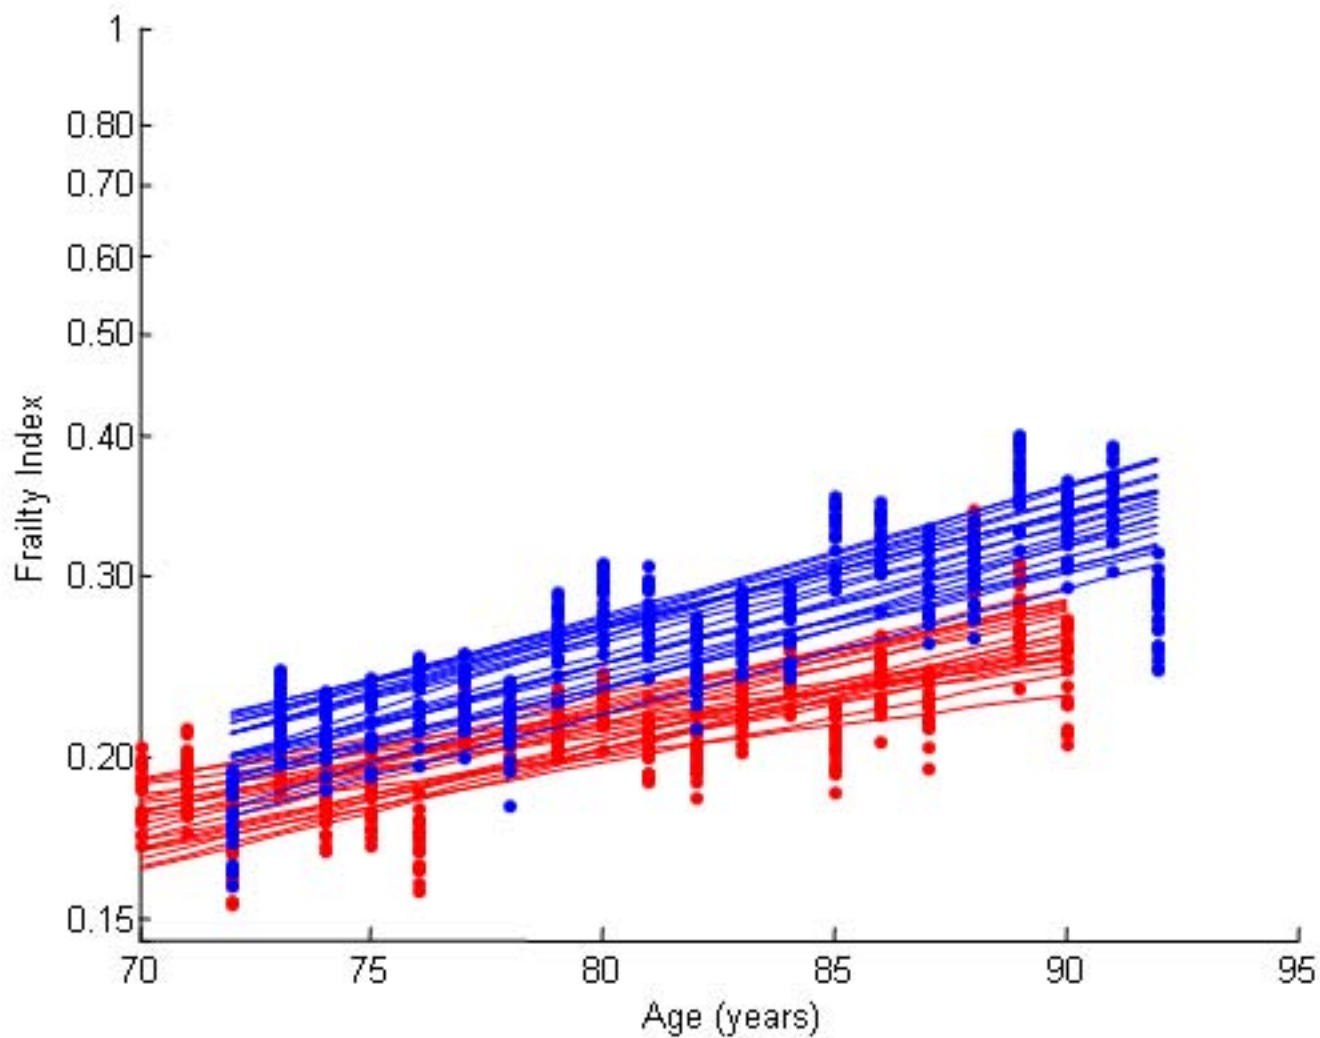

Supplement: 12877_2008_118_MOESM3_ESM.pdf [file 12877_2008_118_MOESM3_ESM.pdf]
